# Supplementary material
Source: publisher figshare collection journal article supplement (https://future-science-group.figshare.com/ndownloader/files/34386191)
Supplement: Supplementary file 1 [file 34386191]

**Fig. S1** iMSC-sEVs or PBS injected around quadriceps tendon under ultrasound guide. **A** Ultrasonogram of a rat's right leg (anterior view) showed quadriceps tendon (yellow triangles). **B** Ultrasonogram showed the relative position of needle (red arrows) used to inject iMSC-sEVs or PBS around the quadriceps tendon. **C** In vivo imaging of rat right lower limbs after injection of iMSC-sEVs labeled with DiR dye.

**Fig. S2** iMSC-sEVs significantly reduced the expressions of iNOS and CGRP in DRG compared with the vehicle treatment. **A** Representative images of double immunofluorescence staining on DRG sections for iNOS and CGRP.Scale bar = 100μm. **B** Quantification of positive areas by mean gray value, n=3 per group. Data were expressed as mean ± SD. **P* ＜0.05. ***P* ＜0.01. ****P* ＜0.001.
